# Supplementary material
Source: PubMed Central journal article supplement (PMC11446481)
Supplement: NIHMS1932294-supplement-1.pdf [file NIHMS1932294-supplement-1.pdf]

**Supplementary Table S1. Descriptive statistics and standardized mean changes for all internalizing symptom dimensions.**

| <b>Dimension</b>     | <b>Assessment</b> | <b>Mean</b> | <b>SD</b> | <b>SE</b> | <b>Standardized mean change from baseline to follow-up (Cohen's <i>d</i>)</b> |
|----------------------|-------------------|-------------|-----------|-----------|-------------------------------------------------------------------------------|
| Dysphoria            | Baseline          | 2.03        | 0.68      | 0.04      | 0.08                                                                          |
|                      | Follow-Up         | 2.08        | 0.77      | 0.05      |                                                                               |
| Well-being           | Baseline          | 3.06        | 0.43      | 0.03      | -0.03                                                                         |
|                      | Follow-Up         | 3.05        | 0.46      | 0.03      |                                                                               |
| Panic                | Baseline          | 1.30        | 0.40      | 0.03      | -0.03                                                                         |
|                      | Follow-Up         | 1.29        | 0.43      | 0.03      |                                                                               |
| Lassitude            | Baseline          | 2.27        | 0.67      | 0.04      | 0.12                                                                          |
|                      | Follow-Up         | 2.34        | 0.76      | 0.05      |                                                                               |
| Insomnia             | Baseline          | 1.78        | 0.56      | 0.04      | 0.04                                                                          |
|                      | Follow-Up         | 1.81        | 0.68      | 0.04      |                                                                               |
| Suicidality          | Baseline          | 1.14        | 0.32      | 0.02      | 0.06                                                                          |
|                      | Follow-Up         | 1.16        | 0.35      | 0.02      |                                                                               |
| Appetite Loss        | Baseline          | 1.71        | 0.83      | 0.05      | -0.07                                                                         |
|                      | Follow-Up         | 1.65        | 0.82      | 0.05      |                                                                               |
| Appetite Gain        | Baseline          | 2.01        | 0.77      | 0.05      | -0.06                                                                         |
|                      | Follow-Up         | 1.97        | 0.85      | 0.06      |                                                                               |
| Ill-temper           | Baseline          | 1.46        | 0.45      | 0.03      | 0.05                                                                          |
|                      | Follow-Up         | 1.49        | 0.56      | 0.04      |                                                                               |
| Social Anxiety       | Baseline          | 1.86        | 0.69      | 0.05      | -0.36                                                                         |
|                      | Follow-Up         | 1.66        | 0.58      | 0.04      |                                                                               |
| Traumatic Intrusions | Baseline          | 1.47        | 0.56      | 0.04      | 0.05                                                                          |
|                      | Follow-Up         | 1.50        | 0.65      | 0.04      |                                                                               |

*Note.* Baseline N = 234. Follow-up N = 230.

**Supplementary Table S2. Parameter estimates from univariate unconditional LCS models of internalizing symptoms.**

| Parameter                                        | Lassitude        | Insomnia          | Suicidality       |
|--------------------------------------------------|------------------|-------------------|-------------------|
| Covariance of LCS factor with baseline symptoms  | -0.12 (0.03)***  | -0.123 (0.029)*** | -0.044 (0.013)*** |
| Correlation of LCS factor with baseline symptoms | -0.29***         | -0.35***          | -0.42***          |
| LCS factor intercept                             | 0.070 (0.039)    | -0.389 (0.061)    | -0.019 (0.021)    |
| Standardized LCS factor intercept                | 0.12             | -0.05             | -0.06             |
| Baseline symptom mean                            | 2.268 (0.044)*** | 1.783 (0.037)***  | 1.142 (0.021)***  |
| LCS factor variance                              | 0.359 (0.038)*** | 0.389 (0.061)***  | 0.106 (0.022)***  |
| Baseline symptom variance                        | 0.451 (0.054)*** | 0.316 (0.047)***  | 0.100 (0.028)***  |

  

| Parameter                                        | Appetite Loss    | Appetite Gain     | Ill-temper        |
|--------------------------------------------------|------------------|-------------------|-------------------|
| Covariance of LCS factor with baseline symptoms  | -0.35 (0.06)***  | -0.246 (0.046)*** | -0.080 (0.024)*** |
| Correlation of LCS factor with baseline symptoms | -0.51***         | -0.41***          | -0.35***          |
| LCS factor intercept                             | -0.050 (0.055)   | -0.046 (0.052)    | 0.029 (0.034)     |
| Standardized LCS factor intercept                | -0.06            | -0.06             | 0.06              |
| Baseline symptom mean                            | 1.708 (0.054)*** | 2.014 (0.050)***  | 1.463 (0.029)***  |
| LCS factor variance                              | 0.699 (0.093)*** | 0.619 (0.067)***  | 0.264 (0.037)***  |
| Baseline symptom variance                        | 0.688 (0.095)*** | 0.588 (0.061)***  | 0.203 (0.026)***  |

  

| Parameter                                        | Social Anxiety    | Traumatic Intrusions |
|--------------------------------------------------|-------------------|----------------------|
| Covariance of LCS factor with baseline symptoms  | -0.226 (0.037)*** | -0.132 (0.029)***    |
| Correlation of LCS factor with baseline symptoms | -0.59***          | -0.39***             |
| LCS factor intercept                             | -0.199 (0.037)    | -0.027 (0.040)       |
| Standardized LCS factor intercept                | -0.36             | 0.04                 |
| Baseline symptom mean                            | 1.859 (0.045)***  | 1.473 (0.037)***     |
| LCS factor variance                              | 0.308 (0.046)***  | 0.366 (0.066)***     |
| Baseline symptom variance                        | 0.474 (0.053)***  | 0.314 (0.054)***     |

*Note.* Standard errors appear in parentheses. \*\*\*  $p < 0.001$ . All parameter estimates are unstandardized except for the standardized LCS factor intercept and the correlation of the LCS factor with baseline symptoms.

**Table S3. Gender differences in change-factor mean and variance estimates in unconditional LCS models of internalizing symptom change**

| Parameter              | IDAS Scale | Estimate |       | Likelihood Ratio Test |          |
|------------------------|------------|----------|-------|-----------------------|----------|
|                        |            | Men      | Women | $\chi^2(1)$           | <i>p</i> |
| Change Factor Mean     | Dysphoria  | -0.093   | 0.254 | 7.11                  | < 0.01   |
|                        | Well-being | -0.075   | 0.028 | 0.61                  | 0.43     |
|                        | Panic      | -0.137   | 0.059 | 2.67                  | 0.10     |
| Change Factor Variance | Dysphoria  | 0.382    | 0.397 | 0.02                  | 0.89     |
|                        | Well-being | 0.174    | 0.140 | 0.99                  | 0.32     |
|                        | Panic      | 0.102    | 0.144 | 0.80                  | 0.37     |

*Note.* We report standardized estimates for the LCS factor means across genders and unstandardized estimates for the LCS factor variance parameter estimates. IDAS = Inventory of Depression and Anxiety Symptoms; df = degrees of freedom.

**Table S4. Gender differences in personality domains' prospective associations with internalizing symptoms**

| IDAS Scale | Personality Domain     | Standardized Estimate |        | Likelihood Ratio Test |          |
|------------|------------------------|-----------------------|--------|-----------------------|----------|
|            |                        | Men                   | Women  | $\chi^2(1)$           | <i>p</i> |
| Dysphoria  | Neuroticism            | 0.249                 | 0.169  | 0.09                  | 0.77     |
|            | Extraversion           | 0.092                 | -0.055 | 1.06                  | 0.30     |
|            | Agreeableness          | -0.078                | -0.097 | 0.34                  | 0.85     |
|            | Conscientiousness      | -0.094                | -0.157 | 0.15                  | 0.69     |
|            | Openness to Experience | -0.020                | 0.017  | 0.11                  | 0.74     |
| Well-being | Neuroticism            | -0.036                | 0.156  | 1.44                  | 0.23     |
|            | Extraversion           | -0.084                | 0.111  | 1.64                  | 0.20     |
|            | Agreeableness          | 0.058                 | 0.059  | 0.00                  | 0.99     |
|            | Conscientiousness      | 0.125                 | -0.063 | 2.05                  | 0.15     |
|            | Openness to Experience | 0.049                 | 0.182  | 0.89                  | 0.34     |
| Panic      | Neuroticism            | 0.039                 | -0.001 | 0.05                  | 0.82     |
|            | Extraversion           | 0.046                 | -0.027 | 0.39                  | 0.53     |
|            | Agreeableness          | 0.014                 | -0.137 | 2.35                  | 0.12     |
|            | Conscientiousness      | -0.130                | -0.100 | 0.01                  | 0.93     |
|            | Openness to Experience | 0.010                 | 0.115  | 1.17                  | 0.28     |

*Note.* Parameter estimates represent standardized multiple regression coefficients, adjusted for effects of the other 4 personality domains, in multiple-group models that allowed this coefficient to vary freely across gender. The likelihood ratio test compares the fit of this “unconstrained” model to the fit of a constrained model that forced regression coefficients for a particular personality domain to equality across gender. IDAS = Inventory of Depression and Anxiety Symptoms; df = degrees of freedom.



|                             |               |              |                   |               |              |              |                   |              |
|-----------------------------|---------------|--------------|-------------------|---------------|--------------|--------------|-------------------|--------------|
| Depression                  | 0.017         | 0.021        | 0.406             | 0.086         | 0.000        | 0.015        | 0.990             | 0.001        |
| Anxiety                     | -0.017        | 0.019        | 0.366             | -0.084        | -0.019       | 0.018        | 0.295             | -0.088       |
| Emotional Volatility        | <b>0.053</b>  | <b>0.019</b> | <b>0.007</b>      | <b>0.266</b>  | <b>0.064</b> | <b>0.017</b> | <b>&lt; 0.001</b> | <b>0.315</b> |
| <b>Ill-temper</b>           |               |              |                   |               |              |              |                   |              |
| Depression                  | <b>0.024</b>  | <b>0.010</b> | <b>0.013</b>      | <b>0.203</b>  | 0.004        | 0.012        | 0.736             | 0.031        |
| Anxiety                     | 0.002         | 0.008        | 0.794             | 0.017         | 0.001        | 0.012        | 0.932             | 0.008        |
| Emotional Volatility        | <b>0.047</b>  | <b>0.009</b> | <b>&lt; 0.001</b> | <b>0.405</b>  | <b>0.027</b> | <b>0.012</b> | <b>0.029</b>      | <b>0.202</b> |
| <b>Social Anxiety</b>       |               |              |                   |               |              |              |                   |              |
| Depression                  | <b>0.112</b>  | <b>0.012</b> | <b>&lt; 0.001</b> | <b>0.630</b>  | 0.013        | 0.014        | 0.332             | 0.092        |
| Anxiety                     | <b>0.035</b>  | <b>0.013</b> | <b>0.008</b>      | <b>0.191</b>  | 0.014        | 0.011        | 0.177             | 0.097        |
| Emotional Volatility        | <b>-0.027</b> | <b>0.012</b> | <b>0.027</b>      | <b>-0.150</b> | 0.000        | 0.010        | 0.982             | 0.002        |
| <b>Traumatic Intrusions</b> |               |              |                   |               |              |              |                   |              |
| Depression                  | <b>0.045</b>  | <b>0.013</b> | <b>&lt; 0.001</b> | <b>0.310</b>  | 0.012        | 0.013        | 0.355             | 0.079        |
| Anxiety                     | 0.009         | 0.010        | 0.404             | 0.057         | -0.019       | 0.012        | 0.123             | -0.115       |
| Emotional Volatility        | 0.019         | 0.011        | 0.085             | 0.133         | <b>0.032</b> | <b>0.013</b> | <b>0.013</b>      | <b>0.204</b> |

Note. Bolded parameter estimates are statistically significant ( $p < 0.05$ ).

**Table S5.2: Regressions of LCS Model Variables on Baseline E/PE Facets**

|                      | <i>Baseline Symptoms</i> |              |                   |               | <i>Symptom LCS Factor</i> |              |              |               |
|----------------------|--------------------------|--------------|-------------------|---------------|---------------------------|--------------|--------------|---------------|
|                      | <i>b</i>                 | <i>SE</i>    | <i>p</i>          | $\beta$       | <i>B</i>                  | <i>SE</i>    | <i>p</i>     | $\beta$       |
| <b>Dysphoria</b>     |                          |              |                   |               |                           |              |              |               |
| Sociability          | 0.014                    | 0.013        | 0.275             | 0.087         | <b>0.033</b>              | <b>0.015</b> | <b>0.026</b> | <b>0.210</b>  |
| Assertiveness        | <b>-0.037</b>            | <b>0.013</b> | <b>0.004</b>      | <b>-0.192</b> | -0.015                    | 0.017        | 0.395        | -0.080        |
| Energy Level         | <b>-0.094</b>            | <b>0.017</b> | <b>&lt; 0.001</b> | <b>-0.441</b> | <b>-0.047</b>             | <b>0.019</b> | <b>0.013</b> | <b>-0.234</b> |
| <b>Well-being</b>    |                          |              |                   |               |                           |              |              |               |
| Sociability          | -0.003                   | 0.008        | 0.766             | -0.024        | -0.010                    | 0.008        | 0.224        | -0.102        |
| Assertiveness        | 0.015                    | 0.009        | 0.079             | 0.122         | 0.002                     | 0.010        | 0.828        | 0.020         |
| Energy Level         | <b>0.073</b>             | <b>0.009</b> | <b>&lt; 0.001</b> | <b>0.536</b>  | <b>0.022</b>              | <b>0.010</b> | <b>0.028</b> | <b>0.174</b>  |
| <b>Panic</b>         |                          |              |                   |               |                           |              |              |               |
| Sociability          | -0.001                   | 0.009        | 0.937             | -0.007        | 0.012                     | 0.008        | 0.151        | 0.135         |
| Assertiveness        | -0.009                   | 0.009        | 0.279             | -0.080        | -0.008                    | 0.011        | 0.464        | -0.079        |
| Energy Level         | <b>-0.037</b>            | <b>0.010</b> | <b>&lt; 0.001</b> | <b>-0.297</b> | -0.012                    | 0.008        | 0.133        | -0.109        |
| <b>Lassitude</b>     |                          |              |                   |               |                           |              |              |               |
| Sociability          | 0.020                    | 0.014        | 0.164             | 0.121         | 0.022                     | 0.013        | 0.085        | 0.153         |
| Assertiveness        | <b>-0.032</b>            | <b>0.016</b> | <b>0.040</b>      | <b>-0.166</b> | -0.011                    | 0.014        | 0.459        | -0.061        |
| Energy Level         | <b>-0.071</b>            | <b>0.017</b> | <b>&lt; 0.001</b> | <b>-0.336</b> | <b>-0.035</b>             | <b>0.016</b> | <b>0.030</b> | <b>-0.186</b> |
| <b>Insomnia</b>      |                          |              |                   |               |                           |              |              |               |
| Sociability          | 0.011                    | 0.012        | 0.375             | 0.079         | 0.022                     | 0.015        | 0.128        | 0.146         |
| Assertiveness        | -0.003                   | 0.013        | 0.826             | -0.018        | -0.020                    | 0.017        | 0.250        | -0.109        |
| Energy Level         | <b>-0.053</b>            | <b>0.014</b> | <b>&lt; 0.001</b> | <b>-0.301</b> | <b>-0.028</b>             | <b>0.014</b> | <b>0.049</b> | <b>-0.142</b> |
| <b>Suicidality</b>   |                          |              |                   |               |                           |              |              |               |
| Sociability          | 0.000                    | 0.006        | 0.980             | 0.002         | -0.000                    | 0.006        | 0.994        | -0.001        |
| Assertiveness        | -0.006                   | 0.006        | 0.358             | -0.063        | -0.008                    | 0.006        | 0.183        | -0.086        |
| Energy Level         | <b>-0.031</b>            | <b>0.007</b> | <b>&lt; 0.001</b> | <b>-0.312</b> | -0.016                    | 0.011        | 0.149        | -0.156        |
| <b>Appetite Loss</b> |                          |              |                   |               |                           |              |              |               |
| Sociability          | -0.000                   | 0.016        | 0.976             | -0.002        | 0.018                     | 0.017        | 0.284        | 0.089         |
| Assertiveness        | -0.023                   | 0.019        | 0.230             | -0.096        | -0.010                    | 0.018        | 0.560        | -0.042        |
| Energy Level         | <b>-0.072</b>            | <b>0.021</b> | <b>&lt; 0.001</b> | <b>-0.275</b> | <b>-0.056</b>             | <b>0.022</b> | <b>0.013</b> | <b>-0.211</b> |
| <b>Appetite Gain</b> |                          |              |                   |               |                           |              |              |               |
| Sociability          | <b>0.043</b>             | <b>0.018</b> | <b>0.016</b>      | <b>0.226</b>  | <b>0.045</b>              | <b>0.017</b> | <b>0.009</b> | <b>0.233</b>  |

|                             |               |              |                   |               |               |              |              |               |
|-----------------------------|---------------|--------------|-------------------|---------------|---------------|--------------|--------------|---------------|
| Assertiveness               | -0.031        | 0.018        | 0.083             | -0.140        | -0.013        | 0.017        | 0.449        | -0.057        |
| Energy Level                | -0.028        | 0.020        | 0.158             | -0.115        | -0.030        | 0.017        | 0.085        | -0.120        |
| <b>Ill-temper</b>           |               |              |                   |               |               |              |              |               |
| Sociability                 | 0.002         | 0.008        | 0.779             | 0.022         | 0.016         | 0.012        | 0.166        | 0.130         |
| Assertiveness               | 0.012         | 0.010        | 0.238             | 0.092         | -0.013        | 0.012        | 0.279        | -0.089        |
| Energy Level                | <b>-0.046</b> | <b>0.011</b> | <b>&lt; 0.001</b> | <b>-0.322</b> | -0.017        | 0.014        | 0.237        | -0.103        |
| <b>Social Anxiety</b>       |               |              |                   |               |               |              |              |               |
| Sociability                 | -0.025        | 0.013        | 0.055             | -0.149        | 0.005         | 0.011        | 0.676        | 0.034         |
| Assertiveness               | <b>-0.060</b> | <b>0.015</b> | <b>&lt; 0.001</b> | <b>-0.302</b> | -0.019        | 0.014        | 0.171        | -0.120        |
| Energy Level                | <b>-0.051</b> | <b>0.015</b> | <b>0.001</b>      | <b>-0.233</b> | -0.018        | 0.012        | 0.138        | -0.102        |
| <b>Traumatic Intrusions</b> |               |              |                   |               |               |              |              |               |
| Sociability                 | 0.001         | 0.011        | 0.900             | 0.010         | 0.044         | 0.014        | 0.002        | 0.296         |
| Assertiveness               | -0.015        | 0.013        | 0.256             | -0.094        | 0.030         | 0.016        | 0.063        | -0.174        |
| Energy Level                | <b>-0.031</b> | <b>0.015</b> | <b>0.046</b>      | <b>-0.174</b> | <b>-0.041</b> | <b>0.015</b> | <b>0.005</b> | <b>-0.215</b> |

Note. Bolded parameter estimates are statistically significant ( $p < 0.05$ ).

**Table S5.3: Regressions of LCS Model Variables on Baseline Agreeableness Facets**



|                      | <i>Baseline Symptoms</i> |              |                   |               | <i>Symptom LCS Factor</i> |           |          |         |
|----------------------|--------------------------|--------------|-------------------|---------------|---------------------------|-----------|----------|---------|
|                      | <i>b</i>                 | <i>SE</i>    | <i>p</i>          | $\beta$       | <i>b</i>                  | <i>SE</i> | <i>p</i> | $\beta$ |
| <b>Dysphoria</b>     |                          |              |                   |               |                           |           |          |         |
| Compassion           | 0.026                    | 0.019        | 0.184             | 0.099         | -0.013                    | 0.020     | 0.496    | -0.054  |
| Respectfulness       | -0.027                   | 0.022        | 0.227             | -0.105        | -0.032                    | 0.018     | 0.085    | -0.131  |
| Trust                | <b>-0.086</b>            | <b>0.016</b> | <b>&lt; 0.001</b> | <b>-0.414</b> | 0.001                     | 0.016     | 0.946    | 0.006   |
| <b>Well-being</b>    |                          |              |                   |               |                           |           |          |         |
| Compassion           | 0.003                    | 0.014        | 0.833             | 0.017         | 0.000                     | 0.011     | 0.976    | 0.002   |
| Respectfulness       | 0.006                    | 0.012        | 0.647             | 0.035         | 0.017                     | 0.011     | 0.135    | 0.110   |
| Trust                | <b>0.050</b>             | <b>0.011</b> | <b>&lt; 0.001</b> | <b>0.379</b>  | -0.003                    | 0.010     | 0.791    | -0.022  |
| <b>Panic</b>         |                          |              |                   |               |                           |           |          |         |
| Compassion           | -0.005                   | 0.011        | 0.635             | -0.035        | -0.001                    | 0.009     | 0.877    | -0.010  |
| Respectfulness       | -0.007                   | 0.014        | 0.640             | -0.044        | -0.006                    | 0.009     | 0.520    | -0.043  |
| Trust                | <b>-0.028</b>            | <b>0.011</b> | <b>0.014</b>      | <b>-0.223</b> | -0.005                    | 0.006     | 0.476    | -0.042  |
| <b>Lassitude</b>     |                          |              |                   |               |                           |           |          |         |
| Compassion           | 0.004                    | 0.021        | 0.848             | 0.016         | 0.013                     | 0.021     | 0.531    | 0.056   |
| Respectfulness       | -0.040                   | 0.023        | 0.076             | -0.158        | -0.024                    | 0.019     | 0.201    | -0.106  |
| Trust                | <b>-0.050</b>            | <b>0.018</b> | <b>0.005</b>      | <b>-0.243</b> | -0.017                    | 0.017     | 0.302    | -0.094  |
| <b>Insomnia</b>      |                          |              |                   |               |                           |           |          |         |
| Compassion           | 0.005                    | 0.016        | 0.755             | 0.023         | 0.007                     | 0.018     | 0.677    | 0.031   |
| Respectfulness       | -0.028                   | 0.019        | 0.145             | -0.133        | -0.025                    | 0.018     | 0.175    | -0.104  |
| Trust                | <b>-0.040</b>            | <b>0.014</b> | <b>0.004</b>      | <b>-0.231</b> | 0.004                     | 0.015     | 0.806    | 0.019   |
| <b>Suicidality</b>   |                          |              |                   |               |                           |           |          |         |
| Compassion           | -0.007                   | 0.010        | 0.443             | -0.061        | -0.021                    | 0.011     | 0.069    | -0.166  |
| Respectfulness       | 0.004                    | 0.010        | 0.727             | 0.030         | -0.013                    | 0.007     | 0.076    | -0.102  |
| Trust                | <b>-0.026</b>            | <b>0.010</b> | <b>0.008</b>      | <b>-0.263</b> | 0.001                     | 0.008     | 0.844    | 0.015   |
| <b>Appetite Loss</b> |                          |              |                   |               |                           |           |          |         |
| Compassion           | -0.010                   | 0.024        | 0.669             | -0.032        | -0.009                    | 0.027     | 0.734    | -0.028  |
| Respectfulness       | -0.002                   | 0.030        | 0.944             | -0.007        | -0.027                    | 0.023     | 0.239    | -0.085  |
| Trust                | <b>-0.047</b>            | <b>0.021</b> | <b>0.024</b>      | <b>-0.185</b> | -0.022                    | 0.017     | 0.191    | -0.084  |
| <b>Appetite Gain</b> |                          |              |                   |               |                           |           |          |         |
| Compassion           | 0.006                    | 0.024        | 0.820             | 0.019         | 0.026                     | 0.023     | 0.262    | 0.085   |
| Respectfulness       | <b>-0.090</b>            | <b>0.023</b> | <b>&lt; 0.001</b> | <b>-0.307</b> | -0.030                    | 0.026     | 0.245    | -0.100  |

|                             |               |              |                   |               |        |       |       |        |
|-----------------------------|---------------|--------------|-------------------|---------------|--------|-------|-------|--------|
| Trust                       | 0.005         | 0.021        | 0.822             | 0.020         | -0.004 | 0.021 | 0.837 | -0.017 |
| <b>Ill-temper</b>           |               |              |                   |               |        |       |       |        |
| Compassion                  | -0.003        | 0.014        | 0.814             | -0.019        | -0.019 | 0.013 | .0155 | -0.093 |
| Respectfulness              | <b>-0.045</b> | <b>0.014</b> | <b>0.001</b>      | <b>-0.264</b> | -0.004 | 0.015 | 0.803 | -0.020 |
| Trust                       | <b>-0.034</b> | <b>0.011</b> | <b>0.001</b>      | <b>-0.246</b> | -0.002 | 0.012 | 0.860 | -0.013 |
| <b>Social Anxiety</b>       |               |              |                   |               |        |       |       |        |
| Compassion                  | 0.009         | 0.021        | 0.676             | 0.033         | 0.003  | 0.013 | 0.796 | 0.016  |
| Respectfulness              | -0.013        | 0.023        | 0.557             | -0.051        | -0.001 | 0.015 | 0.921 | -0.007 |
| Trust                       | <b>-0.071</b> | <b>0.016</b> | <b>&lt; 0.001</b> | <b>-0.336</b> | -0.013 | 0.011 | 0.260 | -0.075 |
| <b>Traumatic Intrusions</b> |               |              |                   |               |        |       |       |        |
| Compassion                  | 0.028         | 0.016        | 0.076             | 0.131         | -0.017 | 0.015 | 0.258 | -0.073 |
| Respectfulness              | -0.013        | 0.019        | 0.511             | -0.059        | -0.005 | 0.016 | 0.730 | -0.024 |
| Trust                       | <b>-0.047</b> | <b>0.016</b> | <b>0.004</b>      | <b>-0.270</b> | -0.008 | 0.013 | 0.532 | -0.043 |

Note. Bolded parameter estimates are statistically significant ( $p < 0.05$ ).

**Table S5.4: Regressions of LCS Model Variables on Baseline Conscientiousness Facets**

|                      | <i>Baseline Symptoms</i> |              |                  |              | <i>Symptom LCS Factor</i> |              |             |              |
|----------------------|--------------------------|--------------|------------------|--------------|---------------------------|--------------|-------------|--------------|
|                      | <i>b</i>                 | <i>SE</i>    | <i>p</i>         | $\beta$      | <i>b</i>                  | <i>SE</i>    | <i>p</i>    | $\beta$      |
| <b>Dysphoria</b>     |                          |              |                  |              |                           |              |             |              |
| Organization         | <b>0.036</b>             | <b>0.013</b> | <b>.008</b>      | <b>.195</b>  | -0.016                    | 0.013        | .218        | -.091        |
| Productiveness       | <b>-0.086</b>            | <b>0.016</b> | <b>&lt; .001</b> | <b>-.418</b> | -0.006                    | 0.019        | .741        | -.032        |
| Responsibility       | <b>-0.057</b>            | <b>0.019</b> | <b>.003</b>      | <b>-.244</b> | -0.013                    | 0.018        | .449        | -.061        |
| <b>Well-being</b>    |                          |              |                  |              |                           |              |             |              |
| Organization         | -0.014                   | 0.008        | .086             | -.121        | -0.012                    | 0.008        | .123        | -.112        |
| Productiveness       | <b>0.060</b>             | <b>0.011</b> | <b>&lt; .001</b> | <b>.456</b>  | 0.013                     | 0.010        | .206        | .105         |
| Responsibility       | 0.012                    | 0.011        | .286             | .082         | 0.009                     | 0.011        | .397        | .068         |
| <b>Panic</b>         |                          |              |                  |              |                           |              |             |              |
| Organization         | 0.011                    | 0.010        | .271             | .100         | -0.014                    | 0.007        | .051        | -.141        |
| Productiveness       | <b>-0.035</b>            | <b>0.012</b> | <b>.004</b>      | <b>-.288</b> | 0.003                     | 0.012        | .775        | .031         |
| Responsibility       | -0.019                   | 0.012        | .110             | -.139        | -0.006                    | 0.009        | .490        | -.052        |
| <b>Lassitude</b>     |                          |              |                  |              |                           |              |             |              |
| Organization         | 0.006                    | 0.013        | .628             | .035         | -0.013                    | 0.012        | .284        | -.080        |
| Productiveness       | <b>-0.076</b>            | <b>0.015</b> | <b>&lt; .001</b> | <b>-.370</b> | -0.005                    | 0.017        | .756        | -.030        |
| Responsibility       | <b>-0.049</b>            | <b>0.019</b> | <b>.008</b>      | <b>-.213</b> | 0.011                     | 0.017        | .531        | .052         |
| <b>Insomnia</b>      |                          |              |                  |              |                           |              |             |              |
| Organization         | 0.002                    | 0.013        | .128             | .011         | -0.014                    | 0.012        | .248        | -.081        |
| Productiveness       | <b>-0.033</b>            | <b>0.015</b> | <b>.031</b>      | <b>-.191</b> | -0.011                    | 0.015        | .461        | -.060        |
| Responsibility       | -0.030                   | 0.018        | .109             | -.153        | 0.009                     | 0.016        | .581        | .041         |
| <b>Suicidality</b>   |                          |              |                  |              |                           |              |             |              |
| Organization         | 0.011                    | 0.007        | .097             | .129         | 0.001                     | 0.007        | .907        | .010         |
| Productiveness       | <b>-0.020</b>            | <b>0.009</b> | <b>.029</b>      | <b>-.202</b> | 0.003                     | 0.009        | .728        | .030         |
| Responsibility       | <b>-0.019</b>            | <b>0.008</b> | <b>.020</b>      | <b>-.170</b> | <b>-0.028</b>             | <b>0.010</b> | <b>.006</b> | <b>-.250</b> |
| <b>Appetite Loss</b> |                          |              |                  |              |                           |              |             |              |
| Organization         | -0.008                   | 0.018        | .653             | -.037        | -0.008                    | 0.016        | .629        | -.034        |
| Productiveness       | -0.019                   | 0.021        | .385             | -.073        | 0.012                     | 0.019        | .519        | .047         |
| Responsibility       | <b>-0.056</b>            | <b>0.028</b> | <b>.047</b>      | <b>-.196</b> | <b>-0.050</b>             | <b>0.020</b> | <b>.014</b> | <b>-.175</b> |
| <b>Appetite Gain</b> |                          |              |                  |              |                           |              |             |              |
| Organization         | <b>0.036</b>             | <b>0.017</b> | <b>.035</b>      | <b>.172</b>  | -0.012                    | 0.016        | .469        | -.054        |
| Productiveness       | <b>-0.050</b>            | <b>0.020</b> | <b>.012</b>      | <b>-.213</b> | -0.007                    | 0.020        | .729        | -.029        |

|                             |               |              |                 |              |        |       |      |       |
|-----------------------------|---------------|--------------|-----------------|--------------|--------|-------|------|-------|
| Responsibility              | <b>-0.062</b> | <b>0.023</b> | <b>.006</b>     | <b>-.235</b> | -0.001 | 0.021 | .966 | -.003 |
| <b>Ill-temper</b>           |               |              |                 |              |        |       |      |       |
| Organization                | 0.002         | 0.010        | .835            | .016         | -0.012 | 0.013 | .353 | -.088 |
| Productiveness              | -0.012        | 0.011        | .288            | -.084        | -0.003 | 0.016 | .875 | -.016 |
| Responsibility              | <b>-0.030</b> | <b>0.014</b> | <b>.030</b>     | <b>-.190</b> | -0.022 | 0.016 | .163 | -.124 |
| <b>Social Anxiety</b>       |               |              |                 |              |        |       |      |       |
| Organization                | <b>0.034</b>  | <b>0.014</b> | <b>.012</b>     | <b>.180</b>  | -0.015 | 0.009 | .111 | -.096 |
| Productiveness              | <b>-0.060</b> | <b>0.017</b> | <b>&lt;.001</b> | <b>-.287</b> | -0.007 | 0.011 | .524 | -.041 |
| Responsibility              | <b>-0.066</b> | <b>0.019</b> | <b>.001</b>     | <b>-.276</b> | 0.009  | 0.014 | .554 | .045  |
| <b>Traumatic Intrusions</b> |               |              |                 |              |        |       |      |       |
| Organization                | 0.006         | 0.014        | .661            | .041         | -0.011 | 0.015 | .436 | -.064 |
| Productiveness              | -0.020        | 0.015        | .202            | -.115        | -0.007 | 0.018 | .707 | -.037 |
| Responsibility              | -0.029        | 0.017        | .086            | -.151        | -0.021 | 0.016 | .200 | -.099 |

Note. Bolded parameter estimates are statistically significant ( $p < 0.05$ ).

**Table S5.5: Regressions of LCS Model Variables on Baseline Open-Mindedness Facets**

|                        | <i>Baseline Symptoms</i> |              |                  |              | <i>Symptom LCS Factor</i> |           |          |         |
|------------------------|--------------------------|--------------|------------------|--------------|---------------------------|-----------|----------|---------|
|                        | <i>b</i>                 | <i>SE</i>    | <i>p</i>         | $\beta$      | <i>b</i>                  | <i>SE</i> | <i>p</i> | $\beta$ |
| <b>Dysphoria</b>       |                          |              |                  |              |                           |           |          |         |
| Intellectual Curiosity | 0.008                    | 0.026        | .747             | .029         | -0.014                    | 0.021     | .517     | -.050   |
| Aesthetic Sensitivity  | <b>0.055</b>             | <b>0.013</b> | <b>&lt; .001</b> | <b>.297</b>  | 0.001                     | 0.012     | .913     | .008    |
| Creative Imagination   | <b>-0.056</b>            | <b>0.019</b> | <b>.003</b>      | <b>-.242</b> | 0.003                     | 0.017     | .838     | .016    |
| <b>Well-being</b>      |                          |              |                  |              |                           |           |          |         |
| Intellectual Curiosity | 0.015                    | 0.015        | .292             | .083         | -0.011                    | 0.013     | .375     | -.067   |
| Aesthetic Sensitivity  | <b>-0.019</b>            | <b>0.009</b> | <b>.047</b>      | <b>-.159</b> | 0.009                     | 0.007     | .206     | .087    |
| Creative Imagination   | <b>0.043</b>             | <b>0.012</b> | <b>&lt; .001</b> | <b>.294</b>  | 0.018                     | 0.011     | .110     | .132    |
| <b>Panic</b>           |                          |              |                  |              |                           |           |          |         |
| Intellectual Curiosity | -0.019                   | 0.017        | .252             | -.112        | -0.002                    | 0.010     | .869     | -.011   |
| Aesthetic Sensitivity  | <b>0.019</b>             | <b>0.009</b> | <b>.037</b>      | <b>.173</b>  | 0.005                     | 0.006     | .469     | .047    |
| Creative Imagination   | -0.011                   | 0.011        | .337             | -.079        | 0.004                     | 0.010     | .699     | .031    |
| <b>Lassitude</b>       |                          |              |                  |              |                           |           |          |         |
| Intellectual Curiosity | 0.017                    | 0.023        | .469             | .058         | 0.021                     | 0.019     | .276     | .081    |
| Aesthetic Sensitivity  | <b>0.041</b>             | <b>0.013</b> | <b>.002</b>      | <b>.221</b>  | 0.006                     | 0.011     | .595     | .037    |
| Creative Imagination   | <b>-0.040</b>            | <b>0.017</b> | <b>.020</b>      | <b>-.173</b> | -0.004                    | 0.016     | .824     | -.018   |
| <b>Insomnia</b>        |                          |              |                  |              |                           |           |          |         |
| Intellectual Curiosity | -0.028                   | 0.019        | .142             | -.117        | 0.022                     | 0.019     | .242     | .081    |
| Aesthetic Sensitivity  | <b>0.038</b>             | <b>0.011</b> | <b>&lt; .001</b> | <b>.247</b>  | -0.013                    | 0.012     | .254     | -.077   |
| Creative Imagination   | -0.009                   | 0.014        | .500             | -.047        | -0.003                    | 0.017     | .861     | -.015   |
| <b>Suicidality</b>     |                          |              |                  |              |                           |           |          |         |
| Intellectual Curiosity | -0.004                   | 0.012        | .730             | -.030        | 0.010                     | 0.010     | .306     | .072    |
| Aesthetic Sensitivity  | <b>0.015</b>             | <b>0.007</b> | <b>.032</b>      | <b>.179</b>  | -0.003                    | 0.007     | .687     | -.030   |
| Creative Imagination   | -0.014                   | 0.008        | .100             | -.129        | -0.005                    | 0.008     | .480     | -.048   |
| <b>Appetite Loss</b>   |                          |              |                  |              |                           |           |          |         |
| Intellectual Curiosity | -0.002                   | 0.029        | .956             | -.004        | 0.014                     | 0.025     | .588     | .038    |
| Aesthetic Sensitivity  | <b>0.037</b>             | <b>0.016</b> | <b>.021</b>      | <b>.161</b>  | -0.014                    | 0.016     | .405     | -.060   |
| Creative Imagination   | -0.031                   | 0.023        | .173             | -.109        | -0.011                    | 0.020     | .575     | -.039   |
| <b>Appetite Gain</b>   |                          |              |                  |              |                           |           |          |         |
| Intellectual Curiosity | -0.028                   | 0.024        | .242             | -.085        | 0.013                     | 0.026     | .634     | .037    |
| Aesthetic Sensitivity  | <b>0.053</b>             | <b>0.014</b> | <b>&lt; .001</b> | <b>.253</b>  | 0.015                     | 0.015     | .309     | .071    |

|                             |               |              |             |              |              |              |             |             |
|-----------------------------|---------------|--------------|-------------|--------------|--------------|--------------|-------------|-------------|
| Creative Imagination        | -0.014        | 0.020        | .484        | -.054        | -0.009       | 0.022        | .668        | -.035       |
| <b>Ill-temper</b>           |               |              |             |              |              |              |             |             |
| Intellectual Curiosity      | 0.001         | 0.015        | .930        | .007         | -0.000       | 0.016        | .984        | -.001       |
| Aesthetic Sensitivity       | <b>0.019</b>  | <b>0.009</b> | <b>.029</b> | <b>.152</b>  | 0.010        | 0.011        | .371        | .071        |
| Creative Imagination        | 0.000         | 0.012        | .967        | .003         | -0.004       | 0.016        | .791        | -.024       |
| <b>Social Anxiety</b>       |               |              |             |              |              |              |             |             |
| Intellectual Curiosity      | 0.007         | 0.025        | .770        | .024         | -0.013       | 0.013        | .305        | -.054       |
| Aesthetic Sensitivity       | <b>0.039</b>  | <b>0.013</b> | <b>.003</b> | <b>.206</b>  | <b>0.021</b> | <b>0.009</b> | <b>.023</b> | <b>.139</b> |
| Creative Imagination        | <b>-0.061</b> | <b>0.019</b> | <b>.001</b> | <b>-.260</b> | -0.008       | 0.013        | .528        | -.045       |
| <b>Traumatic Intrusions</b> |               |              |             |              |              |              |             |             |
| Intellectual Curiosity      | -0.004        | 0.021        | .834        | -.018        | 0.009        | 0.016        | .571        | .035        |
| Aesthetic Sensitivity       | 0.020         | 0.011        | .054        | .133         | 0.015        | 0.011        | .178        | .092        |
| Creative Imagination        | 0.005         | 0.014        | .700        | .027         | -0.009       | 0.015        | .547        | -.045       |

Note. Bolded parameter estimates are statistically significant ( $p < 0.05$ ).

**Supplementary Table S6. Regressions of LCS model variables on baseline personality domains.**

|  | <i>Baseline Symptoms</i> | <i>LCS Factor</i> |
|--|--------------------------|-------------------|
|--|--------------------------|-------------------|

|                      | <i>b</i>      | <i>SE</i>    | <i>p</i>         | $\beta$      | <i>b</i>      | <i>SE</i>    | <i>p</i>    | $\beta$      |
|----------------------|---------------|--------------|------------------|--------------|---------------|--------------|-------------|--------------|
| <b>Lassitude</b>     |               |              |                  |              |               |              |             |              |
| Neuroticism          | <b>0.021</b>  | <b>0.004</b> | <b>&lt; .001</b> | <b>.316</b>  | <b>0.012</b>  | <b>0.005</b> | <b>.023</b> | <b>.199</b>  |
| Extraversion         | -0.005        | 0.005        | .245             | -.070        | 0.001         | 0.004        | .849        | .012         |
| Conscientiousness    | <b>-0.026</b> | <b>0.005</b> | <b>&lt; .001</b> | <b>-.311</b> | -0.002        | 0.006        | .749        | -.026        |
| Agreeableness        | -0.010        | 0.006        | .093             | -.105        | -0.007        | 0.006        | .298        | -.080        |
| Open-mindedness      | <b>0.011</b>  | <b>0.005</b> | <b>.024</b>      | <b>.123</b>  | 0.008         | 0.005        | .145        | .095         |
| <b>Insomnia</b>      |               |              |                  |              |               |              |             |              |
| Neuroticism          | <b>0.023</b>  | <b>0.004</b> | <b>&lt; .001</b> | <b>.407</b>  | 0.005         | 0.005        | .281        | .085         |
| Extraversion         | 0.002         | 0.004        | .514             | .040         | -0.001        | 0.005        | .783        | -.019        |
| Conscientiousness    | <b>-0.008</b> | <b>0.004</b> | <b>.031</b>      | <b>-.122</b> | -0.005        | 0.006        | .424        | -.062        |
| Agreeableness        | -0.008        | 0.005        | .131             | -.101        | 0.000         | 0.006        | .934        | .005         |
| Open-mindedness      | 0.006         | 0.005        | .240             | .075         | -0.001        | 0.005        | .917        | -.006        |
| <b>Suicidality</b>   |               |              |                  |              |               |              |             |              |
| Neuroticism          | <b>0.010</b>  | <b>0.002</b> | <b>&lt; .001</b> | <b>.313</b>  | 0.000         | 0.003        | .992        | .001         |
| Extraversion         | <b>-0.005</b> | <b>0.002</b> | <b>.013</b>      | <b>-.135</b> | <b>-0.005</b> | <b>0.002</b> | <b>.034</b> | <b>-.144</b> |
| Conscientiousness    | -0.002        | 0.002        | .432             | -.041        | -0.004        | 0.002        | .113        | -.098        |
| Agreeableness        | -0.004        | 0.003        | .205             | -.083        | -0.008        | 0.004        | .056        | -.173        |
| Open-mindedness      | 0.002         | 0.003        | .464             | .047         | 0.003         | 0.003        | .322        | .057         |
| <b>Appetite Loss</b> |               |              |                  |              |               |              |             |              |
| Neuroticism          | <b>0.025</b>  | <b>0.005</b> | <b>&lt; .001</b> | <b>.303</b>  | -0.005        | 0.007        | .515        | -.055        |
| Extraversion         | <b>-0.013</b> | <b>0.006</b> | <b>.025</b>      | <b>-.145</b> | -0.007        | 0.006        | .218        | -.075        |
| Conscientiousness    | -0.012        | 0.006        | .073             | -.114        | -0.009        | 0.007        | .177        | -.088        |
| Agreeableness        | -0.000        | 0.008        | .957             | -.004        | -0.017        | 0.009        | .052        | -.149        |
| Open-mindedness      | 0.007         | 0.007        | .315             | .061         | -0.000        | 0.007        | .985        | -.001        |

|                             | <i>Baseline Symptoms</i> |              |                  |              | <i>Symptom Change Score Factor</i> |              |                  |              |
|-----------------------------|--------------------------|--------------|------------------|--------------|------------------------------------|--------------|------------------|--------------|
|                             | <i>b</i>                 | <i>SE</i>    | <i>p</i>         | $\beta$      | <i>b</i>                           | <i>SE</i>    | <i>p</i>         | $\beta$      |
| <b>Appetite Gain</b>        |                          |              |                  |              |                                    |              |                  |              |
| Neuroticism                 | <b>0.012</b>             | <b>0.005</b> | <b>.023</b>      | <b>.165</b>  | <b>0.022</b>                       | <b>0.005</b> | <b>&lt; .001</b> | <b>.287</b>  |
| Extraversion                | 0.011                    | 0.006        | .057             | .130         | <b>0.017</b>                       | <b>0.006</b> | <b>.003</b>      | <b>.188</b>  |
| Conscientiousness           | <b>-0.016</b>            | <b>0.006</b> | <b>.009</b>      | <b>-.171</b> | -0.005                             | 0.007        | .480             | -.051        |
| Agreeableness               | <b>-0.016</b>            | <b>0.008</b> | <b>.046</b>      | <b>-.146</b> | 0.006                              | 0.007        | .372             | .055         |
| Open-mindedness             | 0.011                    | 0.007        | .090             | .105         | 0.001                              | 0.006        | .855             | .010         |
| <b>Ill-temper</b>           |                          |              |                  |              |                                    |              |                  |              |
| Neuroticism                 | <b>0.020</b>             | <b>0.003</b> | <b>&lt; .001</b> | <b>.457</b>  | 0.008                              | 0.005        | .065             | .168         |
| Extraversion                | 0.004                    | 0.003        | .122             | .088         | 0.003                              | 0.004        | .335             | .059         |
| Conscientiousness           | 0.000                    | 0.003        | .959             | .003         | <b>-0.010</b>                      | <b>0.004</b> | <b>.023</b>      | <b>-.153</b> |
| Agreeableness               | <b>-0.019</b>            | <b>0.004</b> | <b>&lt; .001</b> | <b>-.298</b> | -0.004                             | 0.005        | .369             | -.061        |
| Open-mindedness             | <b>0.009</b>             | <b>0.003</b> | <b>.004</b>      | <b>.152</b>  | 0.004                              | 0.004        | .336             | .060         |
| <b>Social Anxiety</b>       |                          |              |                  |              |                                    |              |                  |              |
| Neuroticism                 | <b>0.027</b>             | <b>0.004</b> | <b>&lt; .001</b> | <b>.396</b>  | 0.007                              | 0.003        | .059             | .120         |
| Extraversion                | <b>-0.029</b>            | <b>0.004</b> | <b>&lt; .001</b> | <b>-.374</b> | <b>-0.008</b>                      | <b>0.004</b> | <b>.020</b>      | <b>-.134</b> |
| Conscientiousness           | -0.007                   | 0.004        | .081             | -.088        | -0.004                             | 0.004        | .390             | -.053        |
| Agreeableness               | -0.002                   | 0.005        | .642             | -.024        | -0.001                             | 0.004        | .822             | -.012        |
| Open-mindedness             | 0.003                    | 0.005        | .465             | .036         | 0.004                              | 0.004        | .283             | .056         |
| <b>Traumatic Intrusions</b> |                          |              |                  |              |                                    |              |                  |              |
| Neuroticism                 | <b>0.023</b>             | <b>0.004</b> | <b>&lt; .001</b> | <b>.413</b>  | 0.004                              | 0.005        | .392             | .072         |
| Extraversion                | -0.002                   | 0.004        | .576             | -.038        | 0.001                              | 0.004        | .745             | .019         |
| Conscientiousness           | -0.003                   | 0.004        | .443             | -.043        | -0.010                             | 0.006        | .070             | -.135        |
| Agreeableness               | 0.001                    | 0.005        | .885             | .008         | -0.007                             | 0.006        | .244             | -.080        |
| Open-mindedness             | 0.008                    | 0.005        | .078             | .109         | 0.008                              | 0.004        | .083             | .092         |

Note. Bold parameter estimates are statistically significant ( $p < 0.05$ ).
